# Supplementary material for: Standardising the "Gregory method" for calculating equilibrium climate sensitivity
Source: Copernicus journal article supplement (doi:10.5194/egusphere-2025-2252), 2025-06-06
Supplement: Supplementary file [file egusphere-2025-2252-AC2-supplement.pdf]

To the Editors of GMD,

Attached is our point-by-point response to the reviewer reports of our article, *Standardising the “Gregory Method” for equilibrium climate sensitivity (egusphere-2025-2252)*. We would like to thank the reviewers for the time taken to review our paper.

We are glad that you and the reviewers recognise the benefits of our analysis and recommendations of standardising the Gregory method. The reviewers recommend minor revisions and minor further analysis to address areas of the manuscript that lack clarity or require further explanation. As documented in detail in our responses, we hope that we thereby address the reviewer comments.

In the responses below, the original reviewer reports are in black, while all our comments are in blue. We have also numbered all the reviewer comments and our replies for clarity. We have *quoted proposed updates to the text from the manuscript in grey italics*.

We thank you and the reviewers for the time invested into our manuscript and hope that it will reach the high standards of *Geoscientific Model Development* upon revision.

Best regards,

Anna Zehrung (corresponding author on behalf of all authors)

# Reviewer comments and replies

## Topic Editor comment

I think the abbreviation "r1i1p1f1" in the table and in the text requires explanation that I ask to include in the revised version together with the response to the upcoming reviews. An iteration prior to the review process would unnecessarily delay the process, I think.

We thank the topic editor for this comment and will define our meaning of model variant, including a description of what is meant by "r1i1p1f1".

## Reviewer 1

### Comment 1

Given that the choice of annual averaging method (weighting all months equally versus weighting by number of days) makes essentially no difference to the calculation of ECS (at most 0.02 K), I found it strange that this choice made its way into your recommendation for standardization. My takeaway is that this choice doesn't matter, so my suggestion would be to note that and remove it from the recommended standardization list (e.g., Lines 22-24 in the abstract) so that there is one fewer thing readers will have to keep track of, making it more likely that they will actually follow your recommendations as well.

We thank the reviewer for this comment and appreciate the insight that reducing complexity in recommendations could increase the adoption of our standardisation in future studies. We will remove the annual mean weighting 'choice' from the steps we formally investigate (including in Fig. 1 and 2), and will instead include a short paragraph in the methods detailing our findings that the annual mean weighting method makes almost no difference, so we do not include it as part of the steps.

### Comment 2

Regarding the area weighting, my takeaway from your findings is that for models on a regular latitude-longitude grid, weighting by grid cell area (areacella) and weighting by cosine(latitude) makes no difference. This is of course expected. It's really only those models with output on an irregular grid where weighting by cosine(latitude) produces a different global average than weighting by grid cell area. This is of course also expected, because for an irregular grid, the grid area does not scale like cosine(latitude), and to weight by cosine(latitude) is simply an error. I think it would be much more clear to frame it this way, rather than as a "choice" of area weighting method, which makes it seem like both are acceptable options. Your recommendation to always weight by grid cell area is good since that removes the need to check whether the output is on a regular grid or not, and because weighting by areacella is easier (with less to go wrong) than weighting by cos(latitude) anyway.

Thank you for this comment and recommendation to reframe our analysis and discussion of global mean weighting "choices". We will be including specific information on each model's

grid and resolution in supplementary (see Reviewer 2, Comment 3). We see that the ‘outlier’ models have a native grid (gn), meaning that your expectation that cell area and  $\cos(\text{lat})$  are more likely to differ for these models compared to those with a regular grid. We will update our discussion accordingly and reframe our conclusions.

### Comment 3

Another common choice is calculating anomalies with respect to the long-term average of the piControl simulation. You note this in several places (Lines 101-104) and I thought this was what you mean when you describe taking a climatology (Lines 292, 349, 464). But your results seem to only compare using anomalies relative to the raw piControl (including interannual variability), a 21-year rolling mean, and linear trend (Fig. 3). You should add an analysis using long-term average of the piControl simulation. This choice is far more common than subtracting the raw (annually varying) piControl data, I think.

We thank the reviewer for this comment and will update our study to include a fourth anomaly calculation method which subtracts the abrupt-4xCO<sub>2</sub> experiment from a long-term average of the piControl. This change will be reflected in the decision tree (Fig. 1) and discussion.

We also agree that it may not be common to calculate the anomalies using the raw piControl, however given the number of studies which do not describe how they calculate anomalies (see lines 86-88), it’s possible that no smoothing, averaging or trends are calculated over the piControl to calculate the anomalies in these studies.

### Comment 4

Lines 171-176: It is unclear what you mean by performing “branch alignment” or “correction” here, so please elaborate on what exactly you did and how much it matters. Overall, the need to correctly identify the branch point in order to accurately perform the drift correction you propose (subtracting 21-year rolling averages) should be emphasized more. It’s a step that needs accurate metadata or additional effort to make sure the assumed branch point is correct, and this should be noted and perhaps even made as a concrete recommendation for standardization. Alternatively, many authors just use the long-term average over the piControl in an attempt to avoid having to pay attention to the branch point.

We thank the reviewer for this comment and agree that “branch alignment” or “correction” may be unfamiliar terms for readers who have not downloaded and analysed CMIP6 experiments. We will include an explanation of branch alignment and correction and note the reviewer’s suggestion regarding the long-term average over the piControl as a method of reducing the need to align the piControl and abrupt-4xCO<sub>2</sub>.

See our response to Comment 3 for further discussion regarding the long-term piControl average and additional discussion.

### Comment 5

Does the choice of temperature variable matter? While most studies use near-surface air temperature (“tas”), others use surface temperature (“ts”) which represents the “skin temperature” (i.e., sea-surface temperature over open ocean, surface of sea ice, and surface of land). Does this choice make a difference to ECS, and if so can you make a recommendation to use “tas” rather than “ts”?

We agree that the choice of temperature variable matters, and that not all climate sensitivity studies are clear in the temperature variable they are calculating for the ECS. We are unfamiliar with a global temperature calculated using the surface (or “skin”) temperature globally, as suggested by the reviewer, however there is a clear distinction between GMST and GSAT – where GMST uses 2m air temperature over land and ice and SSTs over ocean, while GSAT uses 2m air temperature, “tas” across all surfaces. While we choose not to investigate these differences in this study, given the IPCC AR6 WG1 (chapter 7) discusses this distinction at length and recommends that model-based estimates of the ECS be calculated using GSAT, we will include a paragraph in the methods describing the importance of explicitly describing which temperature variable is being calculated. We find that while some studies make a clear distinction between GMST and GSAT, other studies refer to the ECS as GMST, but do neither describe the variables nor methods used for calculating the global mean temperature, thus leaving ambiguity in the variable they are calculating.

#### **Comment 6**

I understand the focus on using the Gregory method applied to years 1-150 of 4xCO<sub>2</sub> simulations, which has traditionally been the way people have estimated ECS in GCMs. However, it's becoming increasingly common to estimate ECS using regression over different set of years, for example (i) using years 21-150 which is thought to provide more accurate estimates of equilibrium warming by avoiding some of the initial curvature in the Gregory plot, or (ii) using years 1-300 when longer output is available (e.g., in LongRunMIP or, hopefully, in CMIP7). It would be good to comment on whether the choices you evaluate here also make a difference for ECS estimates using those different choices of years. You could use the available LongRunMIP simulations to test using years 1-300, for example. I imagine that the difference in OLS vs TLS regression methods might matter more when using years 21-150, but might matter less when using years 1-300. I'm not sure about the other choices you explore. But this analysis and associated set of recommendations will become important as alternative regression periods are chosen for evaluation of ECS in CMIP7 models.

We thank the reviewer for the suggestions to investigate the ECS using a regression set over a different number of years. We will perform analysis and include a discussion regarding the differences between OLS and TLS whether using 1-150 or years 21-150. Preliminary analysis shows that the choice of OLS and TLS matters more overall when excluding the initial years, because the absolute correlation value decreases due to an increase of scatter between variables. This is an important finding and should be considered in future studies which exclude the early years of the experiment.

Regarding the LongRunMIP experiments, we agree that increasing the number of simulation years from 150 to 300 could impact ECS estimates. However, we choose not to pursue this investigation for the following reasons:

- (i) We are explicit in our experimental design that we do not explore alternate years as a formal Gregory method choice (line 114).

(ii) LongRunMIP is only available for 15 of the 44 models investigated for this study, thus limiting the sample size of assessing the data processing steps within these models.

(iii) The upcoming CMIP7 model DECK will require abrupt-4xCO<sub>2</sub> experiments to run for at least 300 simulation years. This could be an avenue for potential further study applying alternate regression years to the Gregory Method.

We will include further discussion of the implications of the longer abrupt-4xCO<sub>2</sub> runs for CMIP7 (see Reviewer 3, Comment 2 & 19). In our conclusions, we will recommend future studies to calculate the ECS using years 1-150 and 1-300 for comparison.

#### **Comment 7**

You could also consider testing the available 2xCO<sub>2</sub> simulations. Do the same recommendations apply to calculating ECS in those, or do some choices become more, or less, important? This seems less pressing than my recommendations above.

We thank the reviewer for this comment. We agree that differences in recommendation could arise from assessing abrupt-2xCO<sub>2</sub> experiments. We have a paragraph in the discussion describing that we explicitly do not assess different CO<sub>2</sub> perturbation experiments in this study (see lines 473-482). Given the CO<sub>2</sub> perturbation experiment may impact the ECS estimate depending on the model (a potential result of ECS state-dependence), and given only 11 models ran an abrupt-2xCO<sub>2</sub> experiment with the relevant variables (since it is not part of the CMIP6 DECK), we decide that ECS estimates are incomparable to those calculated using the abrupt-4xCO<sub>2</sub>, and that the sample size is too small for meaningful results relating to different data processing choices. Abrupt-2xCO<sub>2</sub> experiments will be available through CFMIP in AR7 fast track experiments. We hope that a larger number of institutions run this experiment for comparison with abrupt-4xCO<sub>2</sub>.

#### **Line specific:**

#### **Comment 8**

Line 24: You should define piControl

We will update to *preindustrial control simulation for clarity*.

#### **Comment 9**

Lines 40-41: I found this summary of ECS ranges confusing since they are comparing different things. The Charney estimate is an approximate range. The CMIP6 range quoted is simply the range of models. And the AR6 range quoted is the 5-95% range. All measure different things, so it is not correct to say that AR6 narrowed the range relative to the models (it is simply more narrow than the model range). AR6 did narrow the range relative to the 5-95% range reported in AR5 and previous reports. Please reword this to be more clear on these points.

We thank the reviewer for the comment and agree that our description of previous ECS estimates leads to confusion. We will update the paragraph to be more specific with how

each ECS estimate is calculated, and will acknowledge that only the Forster et al.'s (2013) estimate is a true uncertainty range.

**Comment 10**

Line 49: Another paper to cite here is doi: 10.1175/2008JCLI2596.1

We thank the reviewer for this relevant suggestion and we will include this citation in the text.

**Comment 11**

Line 94-104: This felt out of place here since its not really needed here and you discuss the anomaly calculation in more detail below. Later in the paper I found myself scanning back up to this section to see these details. I suggest moving this to where you discuss the anomaly method in more detail below.

Thank you for your feedback on the progression of logic in the introduction and methods. We will update the text such that the detailed description of the anomaly calculations now appears in the methods and we will remove the description from the introduction.

**Comment 12**

Lines 113-117: That's reasonable not to evaluate how ECS values change when using different regression periods, as many other papers look into that already. However, as I noted above, it would be good to check whether your recommendations still apply when using different choices for regression period. The choice of OLS vs TLS regression in particular could matter more or less.

We thank the reviewer for this comment and advise them to see our response to Comment 6.

**Comment 13**

Lines 134, 202: Baseline, Standard, and Alternative pathways are mentioned here, but not yet described. Only later on Lines 262-264 are they described.

Thank you for this comment. We will update the text to describe these pathways. Given we will also be including a new anomaly pathway calculated using a long-term average over the piControl we will also be renaming these pathways to Baseline, Rolling, Linear, and Longterm, to reflect the anomaly calculation method and reduce confusion.

**Comment 14**

Lines 157-170: this feels redundant with the text on Lines 94-104. Also, you should include a fourth choice here (which is common in the literature): calculating anomalies with respect to the long-term climatological mean of the piControl simulation (either over the full length of that simulation, or over the century or so leading up to the branch point).

Thank you for this comment. See our Comment 11 response.

**Comment 15**

Lines 179-181: This is framed as if it needed investigation. But I think it simply has to be true that calculating anomalies before or after summing the variables makes zero difference since these are linear operations.

We thank the reviewer for this comment. We will update the text to simply describe the rndt calculation rather than suggesting this as a potential choice.

#### **Comment 16**

Lines 213-244: This should make more clear that using cosine(latitude) when the grid is irregular is simply an error (not a valid different choice).

Thank you for this comment. See our response to Comment 2.

#### **Comment 17**

Figure 2: Do you have a sense of why OLS vs TLS regression matters so much for some models, but not for others? Can you comment on under what conditions the choice matters?

Thank you for this comment. We describe the potential differences already in lines 291-304, although we will update this discussion for clarity. We find that the models with the most scatter have the lowest absolute correlations between RNDT and TAS, which will have a larger impact on the regression method choice. In addition, see our response to Comment 6 where we will be including further analysis on the differences between OLS and TLS when excluding the first 20 years of the regression.

#### **Comment 18**

Lines 274-282: I found this discussion confusing. Non-closure of the global energy budget does not necessarily cause model drift if the model is fully spun up. It instead just means that there will be a top-of-atmosphere energy imbalance maintained in the piControl state, which balances that non-closure within the model.

Thank you for this comment. We will update our discussion of model drift to reflect these insights.

#### **Comment 19**

Line 307: You mention calculating anomalies relative to the climatological mean here, but as I note above I don't think you've tested that case?

See our response to Comment 3, we will include an anomaly calculation using a long-term average.

#### **Comment 20**

Line 307-309: I think aiming for consistency in how ECS was calculated in Zelinka et al. (2020) is a pretty strong argument. Could you expand this to explain what choices were made in Zelinka et al. with respect to global area and annual averaging methods?

We thank the reviewer for this comment. The Zelinka et al. (2020) study calculated the global mean using a function that computes area weights based on lat/lon bounds. We acknowledge that their study differs in some of the data processing steps compared to some of the choices that we make in our study. However, we recognise this more broadly in the methods (lines 145-149) where we identify that our order of steps may be different to other studies but that the lack of information in methods for many studies inhibits their replicability.



### **Comment 21**

Lines 348-350: I do not follow how removing a climatological average (constant values) or linear trend would change the variability or the correlation between variables.

Thank you for this comment. Firstly, we note that here when we use 'climatology', we are referring to the rolling climatology of the 21-year rolling average. We will update this to reduce confusion, especially since we will be including an additional anomaly method calculated using a long-term average over the piControl.

Secondly, we find that using the N and T anomalies calculated using the 21-year rolling average or linear trend over the piControl increases the absolute correlation between the two variables. We would expect this compared to using the raw piControl because the alternative anomaly methods remove much, if not all, of the interannual variability from the piControl prior to subtracting from the abrupt-4xCO<sub>2</sub> experiment. While the interannual variability within the abrupt-4xCO<sub>2</sub> experiment remains, there is potential that 'noise' is reduced by excluding the variability from the piControl in the anomaly calculation method, thus increasing the absolute correlation between the variables.

### **Comment 22**

You should cite doi: 10.1175/JCLI-D-17-0667.1, who discuss using Deming regression instead of OLS.

Thank you for this relevant suggestion. We will include this citation in the text.

### **Comment 23**

It may be worth mentioning that choices of drift correction method will likely make much more of a difference for the calculation of anomalies in historical simulations (as a percent change), even if they don't matter for ECS calculation. This of course could use further study to compare those choices.

We thank the reviewer for this comment and will include this suggestion in our discussion.

## **Reviewer 2**

### **Comment 1: Background**

The introduction would benefit from a more thorough background on ECS estimation and the Gregory method. For example:

- The Gregory method was originally designed for slab-ocean models, using short (e.g., 20- year) spin-up periods.
- Clarify the concept of radiative forcing in the Gregory framework, especially the distinction between instantaneous radiative forcing and the effective forcing derived from regression.
- Include the rationale behind separating fast and slow feedbacks and how this influences the interpretation of the forcing term.



- Also note that other ECS estimation methods exist, such as the Fixed Sea Surface Temperature (FSST) or AMIP-style configurations, and briefly position the Gregory method in this broader context.

We thank the reviewer for this comment. We will include a paragraph in the introduction to contextualise the Gregory method in the broader literature context and provide reasoning as to why we primarily focus on the ECS compared to forcing in our study. More specifically, we will describe how the Gregory method is likely popular due to the relative simplicity of the linear relationship which allows for a single calculation to estimate the ECS, ERF, and feedback. Additionally, the method does not require the highly specific experiment configurations (like fixed SSTs or AMIP-style configurations) which are generally used to calculate radiative forcing. We will note that the accuracy of the Gregory method is subject to debate, but that our study focuses on the practical application of this method and will leave discussion of its strengths and weaknesses to other works.

In response to the reviewer's first dotpoint, we also would like to emphasize that the Gregory et al. (2004) study included multiple models and experiments. As the reviewer notes, the study compared an atmosphere-only model simulated for 20 years following an abrupt-4xCO<sub>2</sub> increase. However, the Gregory et al. (2004) study also analyses an AOGCM simulated for 90 years for both abrupt-2x and abrupt-4xCO<sub>2</sub>, and 1200 years for abrupt-4xCO<sub>2</sub>. The linear relationship underpinning the Gregory method has multiple uses across the literature, and we focus almost solely on the climate sensitivity aspect, as this has become a key comparative metric for CMIP ensembles and other ECS estimation approaches. The 20-year spin up slab ocean configuration is more consistent for studies which investigate radiative forcing (see also our response to Reviewer 3, Comment 18 for further radiative forcing detail).

## **Comment 2: Inconsistent variable naming**

There are multiple inconsistencies in the use of variable names, which undermine clarity: • Sometimes "temperature" refers to  $\Delta T$  (temperature anomaly), but this should be clearly defined.

- The paper mixes generally used (e.g.,  $N$ ,  $T$ ) and CMIP6-specific (e.g.,  $TAS$ ,  $RNDT$ ) variable names. These should either be standardized throughout or clearly defined at first use.

Thank you for this comment and we will update the text to use  $N$  and  $\Delta T$ , for consistency throughout.

- The symbol  $\lambda$  is typically used in the literature for the climate sensitivity parameter, whereas  $\alpha$  is often used for the feedback parameter. This distinction should be respected throughout the manuscript to avoid confusion.

We agree that in previous literature (e.g. Gregory et al., 2004)  $\alpha$  was used as the standard naming convention for the climate feedback parameter. However, we choose to use  $\lambda$  for the feedback parameter to reflect more recent literature – much of which we cite in the manuscript – such as the Zelinka et al. (2020) study which calculates the ECS range for CMIP6 models, or the Sherwood et al. (2020) paper,

which assesses climate sensitivity based on multiple lines of evidence. We feel that continuing with the more recent naming convention reduces confusion and makes our study comparable to others. Additionally, given the more recent use of  $\lambda$  as the feedback parameter, it could be unclear to readers if we re-define the ECS as  $\lambda$ .

### **Comment 3: Description of Model Data and Experimental Setup**

A centralized and detailed description of the CMIP6 model data (resolution, grid , ...) and experiments (4xCo2 and pi-Control setup) used in the study is currently missing in the methods section. I strongly recommend adding this.

We thank the reviewer for this comment and will update the methods with a cursory description of the model resolutions and grids. Since the models vary widely in grids, we will create a table displaying each model's specific grid and resolution, which we will display in the supplementary material.

### **Comment 4: Extension of discussion section**

Following points in the discussion would be beneficial:

- Although applying the Gregory method to fully coupled models is standard practice today (e.g., CMIP6), this is a methodological shift from the original approach by Gregory et al. (2004), who used a slab ocean. The linearity assumption may break down over long timescales due to deep ocean heat uptake and evolving feedbacks.
- Is standardization worth the complexity, if the impact on ECS is so small? How large is the effect compared to the uncertainty of ECS due to Gregory approximation method?
- Including recommendations for calculating uncertainty ranges in ECS estimates would also be valuable, as it would support standardization in future analyses.

Thank you for these detailed comments. We note here that the Gregory method uses both a slab ocean and fully coupled model, with the original aim of the Gregory method being to use a fully coupled model which does not have to be run to a full equilibrium. We describe this in the introduction (lines 51-57). We agree, however, that the Gregory method's linear assumptions may break over long timescales, with studies exploring altering the Gregory method by, e.g., excluding earlier years of the regression to account for inconstant feedbacks (lines 113-117).

The Gregory method remains widely applied across literature, and will likely be a key initial diagnostic in comparing the upcoming CMIP7 models. For these reasons, the Gregory method will likely remain a useful tool for calculating the ECS, and thus benefits from standardisation. Even though standardisation may make little difference in ECS estimates for some models (although it can make a larger difference for others), another key aspect of the study is calling for transparency for future studies which apply the Gregory method. Currently, a number of key climate sensitivity studies have limited details in methods reducing replicability.

Regarding the uncertainty calculation, we will include this in the recommendation table in the conclusion, and will also include a checklist for future studies to follow if the standardisation methods we recommend go against the methods they hope to use in their study.

## Line specific

### Comment 5

Line 37: global mean surface temperature

We will update.

### Comment 6

Line 44: Clarify that ESMs require a coupled ocean to simulate climate feedbacks and energy balance properly.

Thank you for your comment, we will update the text accordingly.

### Comment 7

Line 51: Define what is meant by a "fully coupled ESM."

We will update to *coupled atmosphere-ocean ESM*.

### Comment 8

Line 59: global mean net radiative flux

We will update.

### Comment 9

Line 60: Define effective radiative forcing and distinguish it from instantaneous RF.

See our response to Comment 1 and our response to Reviewer 3, Comment 18.

### Comment 10

Line 60–61: Use  $\lambda$  for ECS and  $\alpha$  for the feedback parameter, as per standard usage in literature.

Thank you. See our response to Comment 2.

### Comment 11

Line 61: .... is the global mean surface air temperature change ...

We will update. Thank you for this comment, we will also add discussion clarifying temperature differences between GMST and GSAT as per Comment 5 from Reviewer 1.

### Comment 12

Line 65: Gregory (2004) did not use a 150-year simulation—please clarify

We thank the reviewer for directing our attention to this oversight. We will update this line to reflect the 90 years used in the original study but that the standard simulation length has become 150 years. Please see our response to Comment 1 for further detail on what experiments were included in the original study.

**Comment 13**

Line 68: Explain that the Gregory method includes fast feedbacks (e.g., water vapor, clouds) in the forcing term.

See our response to Comment 1. Note that we almost exclusively focus on the ECS in this study.

**Comment 14**

Line 78: When referencing "other climate sensitivity estimates," specify which ones

We agree that we should be specific in this paragraph. We will update the line so that we now describe the Gregory method as a reference method for comparing climate sensitivity based on alternate lines of evidence, such as observations, historical simulations, or palaeoclimate data.

**Comment 15**

Line 85–86: "... many ..." Be precise: Eg. Did Gregory et al. (2004) describe their data processing in detail?

We thank the reviewer for this comment but are unsure how to increase specificity given we cite and separate the papers with varying degrees of data preparation in their methods. We will also be explicit in the paragraph that the Gregory et al. (2004) paper did not describe many of the processing choices we investigate.

**Comment 16**

Line 86: these 150 years are not used in all studies (e.g Gregory et 2004 used 20 years spin-up)

Thank you for the comment. See our response to Comment 1. We cite the studies here which do use the full 150 years, a standard in ECS literature.

**Comment 17**

Line 110: Could you explain differences in OLS and TLS here?

Thank you for the comment. We will update the text to explain the key difference in OLS and TLS as the choice (or lack thereof) of independent variable. We only briefly introduce the concepts here given we further explain them in the methods.

**Comment 18**

Line 117: "...across literature" -> add references

We thank the reviewer for this suggestion and realise our wording causes confusion. We will update the sentence from *... are already well-documented and widely cited across literature* to *.... are already well-documented and these studies are widely cited across literature*. With this change we show that the studies we cite in the previous sentence are the ones which are widely known and cited amongst ECS literature given their explorations of altering the Gregory method through, e.g., excluding earlier years of the regression.

**Comment 19**

Line 123: Emphasize that the paper also evaluates regression methods and uncertainty, not just data processing workflows.

We thank the reviewer for this comment and will update the sentence to reflect each investigation we explore. We also will update Figure 1 (the decision tree) to show that ECS uncertainty is included as part of the study.

**Comment 20**

Line 128: how is TAS defined (1,5m temperature?)

We thank the reviewer for this comment and will include the height (2m for CMIP6 models). As per a recommendation from Reviewer 1, we also include a short discussion of the necessity of explicitly stating the variables used, especially in relation to the common misinterpretations between GMST and GSAT.

**Comment 21**

Line 154: "... to use annual (rather than longer) time period mean" -> Discuss consequences of using longer (e.g., decadal) time means—does it reduce noise or bias estimates?

Thank you for this comment. Given we choose to use only annual means, and do not analyse the potential impacts of using a longer time period mean, we therefore cannot accurately discuss the consequences on the ECS given we have not included it in our study. We acknowledge that most, but not all (e.g. 10.1029/2020GL088852), climate sensitivity studies use the annual mean

**Comment 22**

Line 208: "...we find that the preparation choices matter for a subset of individual models"-> Be specific: Which models are affected?

Thank you for your comment. We will include which models are affected for specificity.

**Comment 23**

Figure2:

- Improve plot resolution
- Use  $\alpha$  instead of  $\lambda$  for the feedback parameter.
- Acknowledge that some models (e.g., ACCESS and WACCM) share codebases and may not be fully independent (in the main text?).
- Include confidence intervals for feedback and ECS.

We thank the reviewer for this comment. We will improve plot resolution, but prefer not to change the  $\lambda$  to  $\alpha$  to avoid confusion with recent papers (see our response to Comment 2). We discuss the confidence intervals in Section 3.4, given we observe some confidence intervals are almost outside of the ECS estimate. We will also acknowledge that some models share codebases and may not be fully independent, including citing this relevant study 10.1029/2022MS003588.

**Comment 24**

Line 215: how can you see from Fig 3a, that this is likely because these models have regular grid

Thank you for this comment. We understand the source of confusion and will adjust our sentence and figure citation to reflect that it is the outlier models shown in Fig. 3a (box and whisker plot outliers), which show a native grid.

**Comment 25**

Line 216: “outliers”: do the outliers have an irregular grid?

Thank you for your comment. Yes, these models have a native (irregular) grid. Note that we will be including a table in our supplementary material describing each model's grid and resolution. In addition, see Reviewer 1, Comment 2 response where we will be altering our discussion of global mean weighting.

**Comment 26**

Fig 3, caption: “range” -> Define what “range” refers to (e.g., min–max, 95% confidence interval). And what is shown median or mean?

Thank you for this comment. We will update the figure caption to include the specifics of what the boxplot is showing.

**Comment 27**

Line 284-295: The comparison of OLS and TLS fits better in Section 3.4—consider moving it.

Thank you for your recommendation. We have included this comparison of OLS and TLS in this section because it discusses the results shown in Fig. 3 including the potential differences in anomaly calculation methods. We will reframe this part of the discussion to focus on the correlation between N and T between the anomaly methods, and that an impact of a lower correlation arises when comparing OLS and TLS. Discussing these differences here is relevant to be able to conclude the subsection with an anomaly method recommendation.

**Comment 28**

Line 314:  $\Delta T$  instead of temperature.

We will update. See our response to Comment 2.

**Comment 29**

Line 318: Clarify what makes temperature choice “not arbitrary” in CMIP6

We thank the reviewer for this comment and clarify that the choice is not arbitrary given the differences in slope depending on whether N or T is the dependent variable. We will update the text to clarify this.

**Comment 30**

Line 330: Explain why this assumption may not hold in fully coupled models.

Thank you for the comment. This comment refers to our assumption that minimal scatter does not hold for many fully coupled CMIP6 models. CMIP6 models include interactive ocean and atmosphere, thus increasing the complexity of feedbacks and interannual variability compared to the single slab ocean model used to assess the “minimal scatter” in 2004. The climate interactions in CMIP6 models can impact the scatter, or correlation, observed between N and T from the abrupt-4xCO<sub>2</sub> anomalies.

We will update the text to clarify this explanation.

**Comment 31**

Line 335-337: can you explain?

These lines refer to the inability to observe a lead/lag relationship between N and T, especially for the highly perturbed abrupt-4xCO<sub>2</sub> experiment, where the climate is being forced under such a strong scenario. In comparison, identifying a lead/lag relationship between N and T based on observations, with a comparatively much weaker forcing, a relationship may be more likely to be identified.

We will update the manuscript to provide further explanation.

**Comment 32**

Line 351: What is meant by historical ensemble? And what is the difference to idealized abrupt CO<sub>2</sub> simulation setups?

Thank you for your comment. We will clarify these in the discussion.

**Comment 33**

Line 359: ESGF

Thank you for this comment but we will require clarification because we have written ESGF in the paper. We will expand this to write the Earth System Grid Federation

**Comment 34**

Line 361: Provide numbers when stating that TLS provides lower ECS—by how much?

We thank the reviewer for their comment and we will be explicit with the ECS calculated using TLS vs OLS, rather than simply providing the differences in slope (feedbacks).

**Comment 35**

Fig 4: Legend is very hard to read. Move to the bottom.

We thank the reviewer for the comment and will update the figure legend accordingly.

**Comment 36**

Line 383: Provide references for "some climate sensitivity studies."



Thank you for this comment. Given most studies do not calculate an uncertainty range around individual ECS values, we will update the text to *lacking from most of the climate sensitivity studies we cite in this paper*, and cite the papers which do calculate uncertainties in the following sentence.

#### **Comment 37**

Line 348: Clarify whether bootstrap is typical—e.g., Gregory et al. (2004) use standard error of the regression slope.

We thank the reviewer for this comment and will clarify in the text that Gregory et al. (2004) use RMS deviation, whereas it is the slightly more recent studies which use the bootstrap approach, although any uncertainty estimate around individual ECS values is uncommon.

#### **Comment 38**

Line 387: "...which does not hold for some models" - > Identify which models violate the independence assumption—most fully coupled models do have interannual autocorrelation.

We will be more specific and identify the models explicitly.

#### **Comment 39**

Line 391: Define AR(1), AR(2), etc., here or in the methods section for clarity.

Thank you, we will define AR1/2 for clarity.

#### **Comment 40**

Line 418-422: Quantify the confidence intervals derived

Thank you for this comment. We will quantify the intervals derived.

#### **Comment 41**

Line 463: Why do most models have no error? Are these the models which have a regular grid?

Thank you for your comment. See our response to Comment 3.

## **Reviewer 3**

#### **Comment 1**

Lines 9–10: Please clarify that ECS is obtained by extrapolating to  $N = 0$  in the  $N-\Delta T$  regression, i.e., the  $\Delta T$  intercept.

We will update this in the abstract.

**Comment 2**

Lines 10–11, 121–123: Given that abrupt-4xCO<sub>2</sub> simulations may extend to 300 years, I wonder how the authors envision ECS estimation in CMIP7, and how best to compare results across phases.

Thank you for this comment. In line 442 we acknowledge that CMIP7 abrupt-4xCO<sub>2</sub> experiments will be run for 300 years instead of the previously standard 150 years. However, we agree that the longer simulations will have an impact on how we compare CMIP7 to previous model generations. We will include a more detailed discussion in the paper (in summary and conclusions) describing these changes in CMIP7 and the potential implications for ECS calculations and for our recommendations and proposed standardisation. We will also be recommending that future studies calculate the ECS using both 1-150 and 1-300 years to compare.

**Comment 3**

Lines 16–18, 460: Please emphasize that these sensitivities occur only for a very small set of models (outliers), while most models are not affected.

Thank you for your comment. We will update the manuscript accordingly.

**Comment 4**

Lines 22–24, 455–459: While I appreciate the recommendations, I find they may make the ECS estimation unnecessarily complicated, especially given the finding of “no statistically significant difference” and “unlikely to see a meaningful difference in results.” Related concerns include: (1) areacella is not commonly used; (2) leap-year treatment varies across calendars (e.g., noleap, julian, gregorian); (3) checking the branching date of each simulation is time-consuming—branch time metadata are usually included in CMIP6 but rarely in CMIP5.

Thank you for your comment. Note lines 145-148 in the manuscript, where we acknowledge that our study may include different data processing choices or order of steps compared to other researchers. However, these differences arise because many studies are not transparent in their methods, which inhibits replicability.

While the impact of some of the different steps we investigate do not result in a meaningful impact on the ECS estimate, the priority is understanding whether there *could be* an impact and, if so, what the impact is. For example, while in practice perhaps researchers understand that areacella is not commonly used, in the literature this is unclear given the number of studies which do not describe their global mean weighting methods entirely. It may be useful for future studies to consider the implications of the global mean weighting method they use, even if they choose not to use areacella.

Regarding leap-year treatment between model calendars, because our analysis is based on annual means (rather than daily or monthly means), differences in calendar conventions (e.g., Gregorian vs. no-leap) do not affect comparability. We calculate annual means by weighting each month by its number of days, so the annual value represents the average per

day in the model year. For robustness, we also tested the simpler approach of weighting each month equally (1/12 per month) and found the effect on ECS to be negligible. Thus, our results are not sensitive to calendar differences, and models using different calendars remain directly comparable in this context.

While we agree also that branch alignment is time-consuming and challenging, this is not a valid argument to avoid the step in the data processing leading up to the regression. We will describe branch alignment more explicitly in methods. Also note lines 174-176 where we state that validating branch information for CMIP7 would reduce the time spent on corrections after the model's original submission.

Our study has two goals: (1) to offer a standardised Gregory method for future studies, and (2) to promote transparency in all methods. This second goal may not be as clearly identified in the study as we would like. As a result, we will increase clarity throughout the paper so that these two goals are clear to readers. Additionally, in the conclusion, we will include a checklist (along with the standardisation recommendation) as a minimum that researchers should be providing to enhance transparency and replicability (such as describing all methods, sharing code, etc.).

#### **Comment 5**

Lines 26–27: Did the authors mean that the “CMIP6 multi-model mean ECS appears not sensitive to these processing choices”?

Yes, that is correct. We will update the text.

#### **Comment 6**

Line 60: Did you mean “the global mean radiative response  $\lambda\Delta T$ ”?

Yes, thank you for the comment. We will update this in the text.

#### **Comment 7**

Lines 65–67: Please confirm whether Gregory et al. (2004) actually used 150-year simulations.

We thank the reviewer for this comment and will update the text to reflect the Gregory et al. (2004) experiment set up of a 90 year simulation (although the standard has since become 150 years). See Reviewer 2, Comment 1 for further details.

#### **Comment 8**

Lines 154–155, 248: Were leap years accounted for, given the different calendars used by models?

Please see our response to Comment 4.

**Comment 9**

Lines 157–170, 269–270 & Fig. 1: Why were anomalies relative to climatological monthly means not considered? Including a climatology-based method could show how model drift affects results.

Thank you for your comment. We will be including an additional anomaly calculation method based on a long-term average over the piControl. See Reviewer 1, Comment 3 response for further details.

**Comment 10**

Lines 171–176: While aligning abrupt-4xCO<sub>2</sub> and piControl at the prescribed branch time is useful, checking branch dates for each model is time-consuming. Would it be possible for modeling centers to standardize branching dates across experiments (e.g., r1) or to mark them more clearly in their piControl runs to simplify this step? The authors might consider recommending this.

Yes - this would be useful for modelling centers to standardise branching. While we describe this in lines 174-176, we can provide a more strongly written recommendation in the discussion.

**Comment 11**

Lines 178–181: Since the variable *rtmt* (TOA net radiative flux) is available for most models, I suggest computing *rtmt* for those models without the variable directly before preprocessing.

Thank you for your comment. Given *rtmt* is available for 35 models used in this study, we will investigate the potential differences between using *rtmt* and our current calculation of *rndt*. From initial research on this topic, it seems that *rtmt* is computed as the 'Top of Model' (TOM), whereas our *rndt* value is calculated as the Top of Atmosphere (TOA). For some models, TOM and TOA can be different, and therefore could impact the energy balance between the variables.

Following analysis, depending on results, we will either include this variable as a 'choice' in our steps, and a recommendation for future researchers, or we will include a short discussion in (e.g.) methods describing potential differences, if these are small.

**Comment 12**

Lines 234–235: Could the authors provide further explanation here, particularly regarding the different distribution of MPI-ESM1-2-HAM compared with the other two models?

Yes, we will provide further explanation. Note that we will also include a table in supplementary material detailing all model's grid and resolution information. Additionally, see our response to Reviewer 1, Comment 2, for further details.

**Comment 13**

Lines 250–251: Given the conclusions, is annual-mean weighting strictly necessary?

We thank the reviewer for this comment and note that this is a similar comment to Reviewer 1, Comment 1. See our response to this comment for details.

**Comment 14**

Lines 265–267 and elsewhere: Why not also report differences in the multi-model mean?

Thank you for your comment. We will include the multi-model mean here and elsewhere for clarity as we revise the manuscript.

**Comment 15**

Lines 306–309, 463–465: I find it odd to recommend anomalies relative to a climatological mean or linear fit initially and then just apply a 21-year running mean over the piControl, citing Zelinka et al. (2020). Widespread use is not, by itself, a sufficient justification.

Thank you for your comment. Here when we refer to a *climatological mean* we mean the rolling average, given a ‘climatology’ is often considered a 20-30 year window average. We understand this leads to confusion and will update the text accordingly.

**Comment 16**

Lines 335–337: Is this effect due to the imposed radiative forcing in the idealized abrupt-4xCO<sub>2</sub> experiment? The argument could be clarified.

Thank you for your comment. That is correct that the lead/lag relationship between N and T is unclear from such a strongly perturbed forcing. We will explain this in the text.

**Comment 17**

Line 361: It might be useful to report ECS values explicitly, rather than only feedback values.

Thank you for your comment. We will include ECS values in addition to the feedback values.

**Comment 18**

Lines 363–364: In fact, previous studies (e.g., Forster et al., 2016; He et al., 2025; Lutsko et al., 2022; Smith et al., 2020) suggest that the Gregory method (OLS) underestimates effective radiative forcing.

Forster, P. M., et al. (2016). JGR: Atmospheres, 121, 12,460–12,475.  
<https://doi.org/10.1002/2016JD025320>

He, H., et al. (2025). ESSOAr. DOI: 10.22541/essoar.175157564.42459435/v1

Lutsko, N. J., et al. (2022). JGR: Atmospheres, 127, e2022JD037486.  
<https://doi.org/10.1029/2022JD037486>

Smith, C. J., et al. (2020). Atmos. Chem. Phys., 20, 9591–9618.  
<https://doi.org/10.5194/acp-20-9591-2020>

Thank you for these relevant citations. It is important to clarify that these studies all find that using the full 150 years of an abrupt-4CO<sub>2</sub> experiment applied to the Gregory method underestimate the ERF in comparison to using either years 1-20 or 1-30 in the regression to calculate the ERF. This low bias indicates that it is the number of years used as inputs in the regression, not necessarily the Gregory method itself, which impacts the ERF estimates. It is for this reason that we focus almost explicitly on the ECS (and feedbacks) in this paper rather than publishing also ERF ranges, given it seems well known that there are more confident estimates of ERF compared to the full 1-150 year Gregory method. See also our response to Comment 1 from Reviewer 2.

The low bias of ERF, however, is an interesting consideration for the regression method itself. It may be possible that using TLS instead of OLS could reduce the ERF bias. We will include discussion accordingly.

**Comment 19**

Lines 436–438: It seems CMIP7 is prioritizing longer simulations rather than additional ensemble members—could the authors comment?

Thank you. See our response to Comment 2.
